# Supplementary material for: The effects of wildfire severity and pyrodiversity on bat occupancy and diversity in fire-suppressed forests
Source: PubMed Central journal article supplement (PMC6895131; doi:10.1038/s41598-019-52875-2), 2019-12-05
Supplement: 41598_2019_52875_MOESM1_ESM.pdf [file 41598_2019_52875_MOESM1_ESM.pdf]

**The effects of wildfire severity and pyrodiversity on bat occupancy and diversity in fire-suppressed forests**

Steel Z. L., Campos B., Frick W.F., Burnett R., and Safford H. D.

**Supplementary Table S.1.** The common name, scientific name and select species characteristics for 17 species known to occur in the Sierra Nevada, ordered by ascending body mass within family. The species characteristics include mean values for body mass (Jones et al. 2009), wing-loading (Norberg and Rayner 1987), call frequency at maximum power (FME), and call duration (Szewczak 2010).

| Common Name              | Scientific Name                  | Mass (g) | Wing-loading (kg/m <sup>2</sup> ) | FME (kHz) | Call Duration (ms) | Selected Scale |
|--------------------------|----------------------------------|----------|-----------------------------------|-----------|--------------------|----------------|
| Vespertilionidae         |                                  |          |                                   |           |                    |                |
| Canyon bat               | <i>Parastrellus hesperus</i>     | 3.5      | 6.9                               | 48.3      | 5.5                | 500            |
| California myotis        | <i>Myotis californicus</i>       | 4.4      | 4.8                               | 52.8      | 3.8                | 250            |
| Small-footed myotis      | <i>Myotis ciliolabrum</i>        | 4.9      | 6.7                               | 49.1      | 3.2                | 50             |
| Yuma myotis              | <i>Myotis yumanensis</i>         | 5.2      | 7.8                               | 55.2      | 5.5                | 250            |
| Long-eared myotis        | <i>Myotis evotis</i>             | 6.9      | 6.1                               | 39.1      | 3.7                | 250            |
| Little brown bat         | <i>Myotis lucifugus</i>          | 7.8      | 7.5                               | 44.5      | 6.0                | 100            |
| Fringed myotis           | <i>Myotis thysanodes</i>         | 8.5      | 6.2                               | 30.7      | 3.9                | 500            |
| Long-legged myotis       | <i>Myotis volans</i>             | 8.6      | 8.3                               | 48.0      | 4.8                | 500            |
| Townsend's big-eared bat | <i>Corynorhinus townsendii</i>   | 10.3     | 7.2                               | 31.1      | 4.6                | 50             |
| Silver-haired bat        | <i>Lasionycteris noctivagans</i> | 10.9     | 8.2                               | 28.8      | 9.2                | 50             |
| Spotted bat              | <i>Euderma maculatum</i>         | 16.2     | -- <sup>a</sup>                   | 12.5      | 3.2                | 500            |
| Big brown bat            | <i>Eptesicus fuscus</i>          | 17.3     | 9.4                               | 31.9      | 7.8                | 500            |
| Western red bat          | <i>Lasiurus blossevillii</i>     | 12.3     | 14.0                              | 14.6      | 10.7               | 250            |
| Pallid bat               | <i>Antrozous pallidus</i>        | 22.2     | 8.1                               | 31.0      | 6.8                | 500            |
| Hoary bat                | <i>Lasiurus cinereus</i>         | 26.8     | 16.5                              | 20.8      | 11.0               | 500            |
| Molossidae               |                                  |          |                                   |           |                    |                |
| Mexican free-tailed bat  | <i>Tadarida brasiliensis</i>     | 12.2     | 11.5                              | 28.0      | 11.5               | 500            |
| Western mastiff bat      | <i>Eumops perotis</i>            | 50.9     | 14.0                              | 41.6      | 10.7               | 250            |

<sup>a</sup> Wing-loading not documented by Norberg and Rayner (1987).

**Supplementary Figure S.1.** The relationship between mean and the standard deviation of basal area mortality at four spatial scales, as defined by 50m, 100m, 250, and 500m radii from sample points. A slight horizontal jitter is added to display overlapping values of mean basal area mortality.

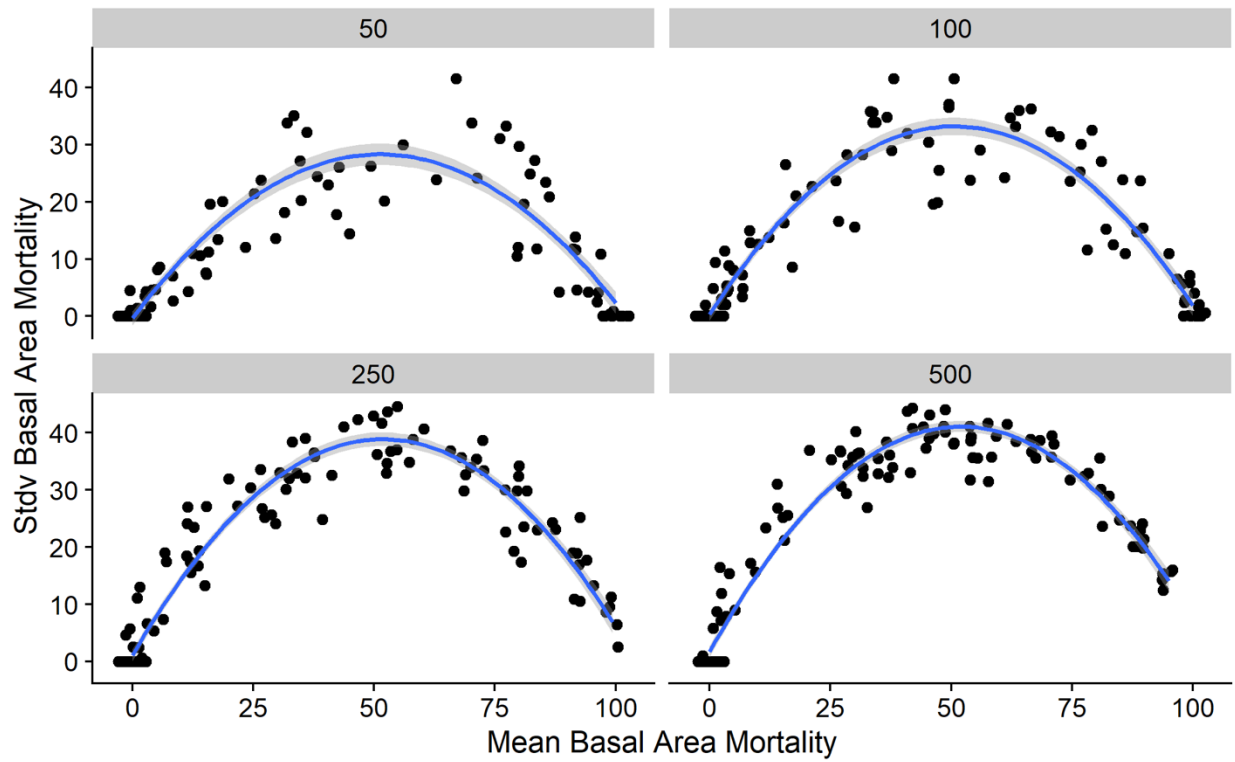

**Supplementary Figure S.2.** LOOIC model weights by species and scale. Selected models are listed in Table S.1.

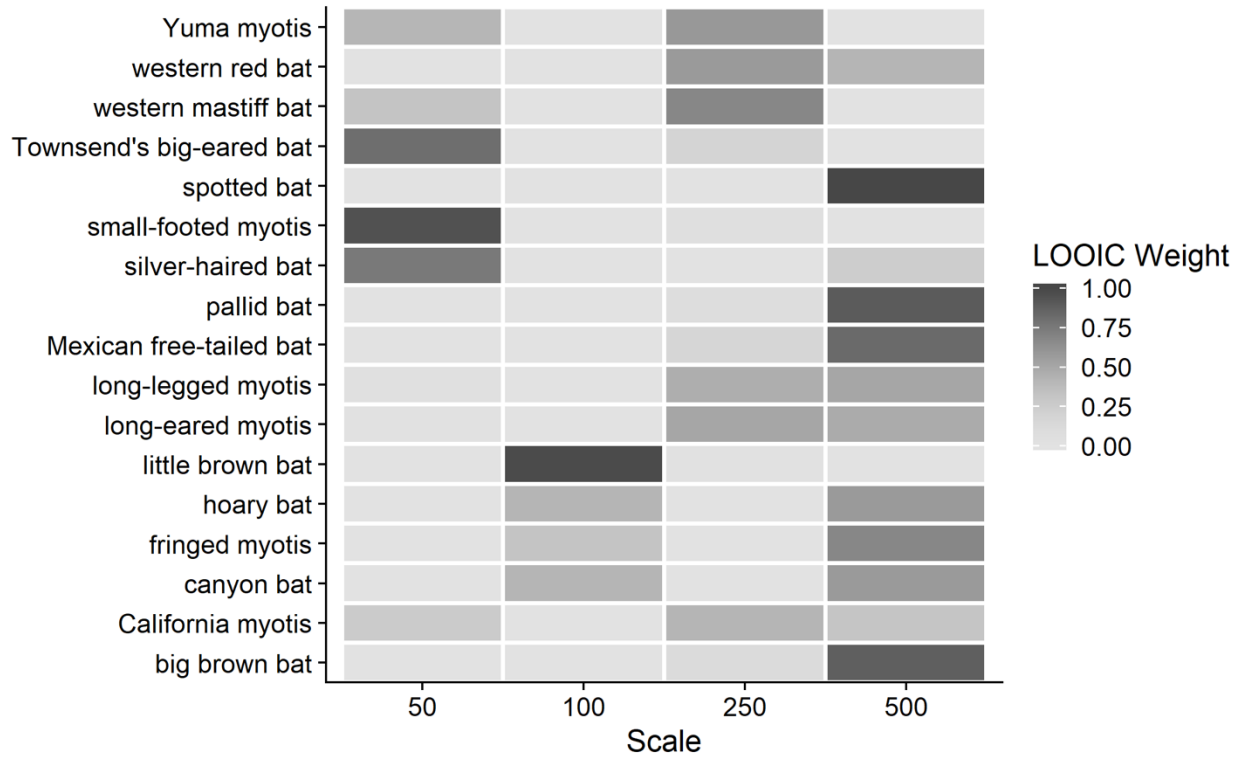

**Supplementary Figure S.3.** Jaccard's dissimilarity across burn severity (basal area mortality BAM). a) Pairwise dissimilarity distributed by severity distance (i.e. difference in BAM), and b) mean dissimilarity between severity groups. The magnitude of dissimilarity is displayed both by color and circle size in the group-wise comparison. Severity groups are defined as unchanged (U; 0% BAM), low (L; 1-25% BAM), moderate (M; 25-75% BAM), and high (H; >75% BAM). Comparisons are made using mean severity calculated with a 500m radius (Figure S.1).

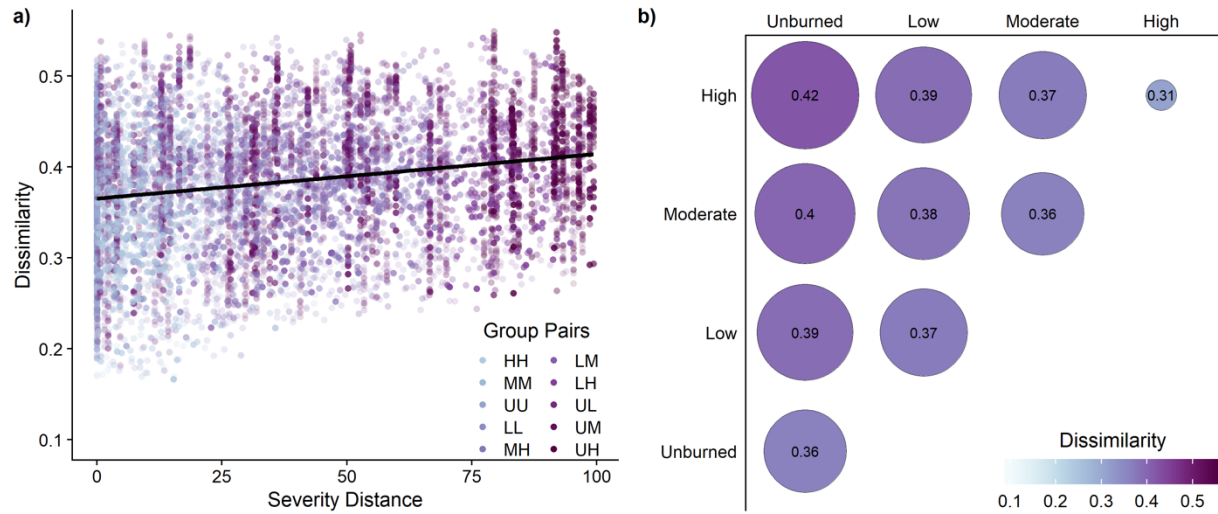

**Supplementary Data S.1.** Bat occurrence and environmental data used to fit occupancy models.

**Supplementary Data S.2.** Parameter estimates for bat species models. The mean, 90% credible interval and probability an effect is positive (i.e. the proportion of the parameter posterior distribution above zero) are listed for each parameter.

**Supplementary Code S.1.** Occupancy model code.

### **Literature Cited in Supplementary Material**

Jones, K. E. *et al.* PanTHERIA: a species-level database of life history, ecology, and geography of extant and recently extinct mammals. *Ecology* 90:2648–2648 (2009).

Norberg, U. M., & J. M. V. Rayner. Ecological morphology and flight in bats (Mammalia; Chiroptera): wing adaptations, flight performance, foraging strategy and echolocation.

*Philosophical Transactions of the Royal Society B: Biological Sciences* 316:335–427 (1987).

Szewczak, J. M. SonoBat version 3.2.1. (2010). [www.sonobat.com](http://www.sonobat.com).
